# Supplementary material
Source: MDPI journal article supplement (https://www.mdpi.com/2673-9992/12/1/34)
Supplement: s1 [file s1]

# Ionic and Aerogel Levothyroxine formulations with improved bioavailability properties

António Barreira<sup>1</sup>, Ana B.Paninho<sup>1</sup>, Luís C. Branco<sup>1</sup>, Márcia G. Ventura<sup>1</sup>

[\\*a.barreira@campus.fct.unl.pt](mailto:a.barreira@campus.fct.unl.pt)

<sup>1</sup>LAQV-REQUIMTE, FCT-NOVA, Quinta da Torre, 2829-516 Caparica, Portugal

## Introduction

Biopolymers are polymers produced from natural sources, chemically synthesized from biological material and or fully biosynthesized by microorganisms. They have an unique strength in their application for drug delivery, which allows for a new breakthrough in the formulation of novel drug delivery systems that enhance therapy and treatment. This can be achieved by functionalizing the surface of polymeric particles. Ionic liquids have gained increasing attention as clean and multifunctional solvents for a variety of applications. The main function of polymeric carriers is to transport the drugs to the required site of action while protecting the drugs from interaction with other molecules. In this work the mixture of kappa-carrageenan [KCAR] with locust bean gum [LBG] (60%/40%) is used. Levothyroxine is the main thyroid hormone in circulation, can be administered orally as sodium salt, is used exclusively for the treatment of various forms of hypothyroidism. Active Pharmaceutical Ingredients (APIs) used in drug formulations are usually found in their crystalline form to maximize their purity, thermal stability, and bioavailability. However, these solid forms have a number of limitations, such as low water solubility, polymorphism, and difficulty in crossing lipid layers due to their insufficient lipophilicity. Pure compounds, salts and all kinds of pharmaceuticals and drug candidates can undergo polymorphism. Chloride ions remain the most commonly used anionic ion counterions for forming salts as APIs, while sodium ions are more commonly used for forming salts from acidic molecules.

## Biopolymers` aerogels Synthesis

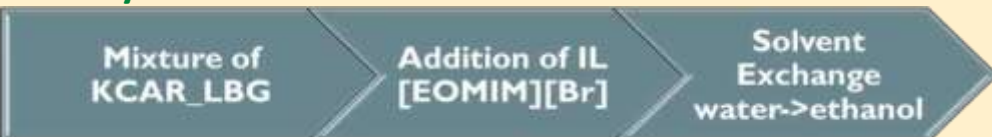

### Characterization

#### SEM

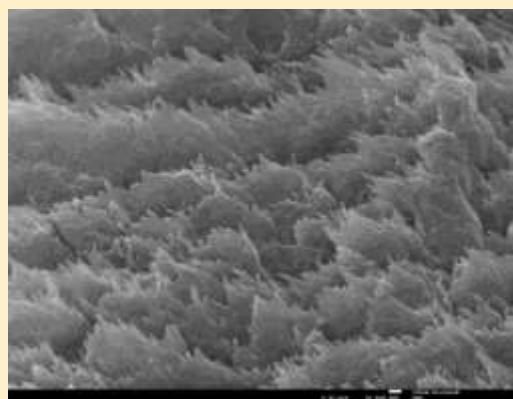

KCAR\_LBG\_T4

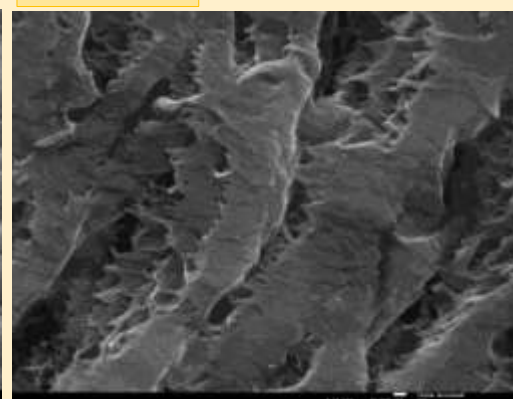

KCAR\_LBG 1:1

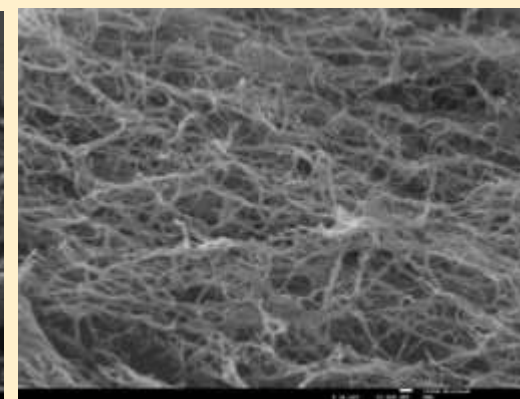

KCAR\_LBG 1:6

SEM images of kappa-carrageenan-locust bean gum dried gels synthesized with different compositions of the ionic liquid [EOMIM][Br]. The network structures of samples produced without [EOMIM][Br] and with the addition of 50% (m/m) of this ionic liquid presented a more dense fiber structure. The dried gel synthesized with

the addition of an ionic liquid excess (300% (m/m)) exhibited a more visible interconnected fiber web structure containing a broad pore distribution including meso and macropores.

#### FTIR-ATR

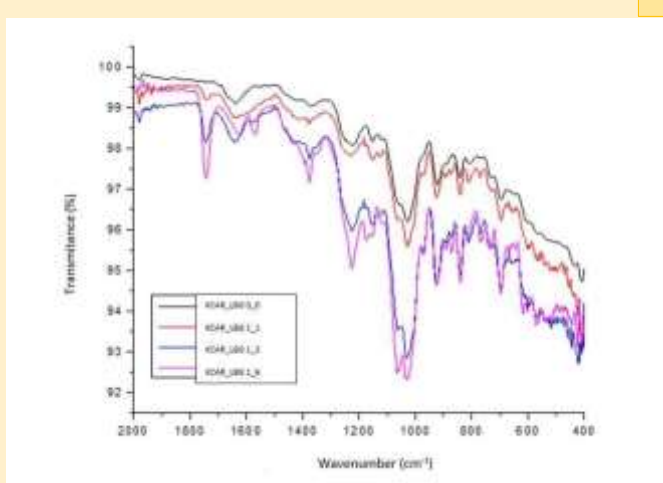

KCAR\_LBG with different IL's ratios

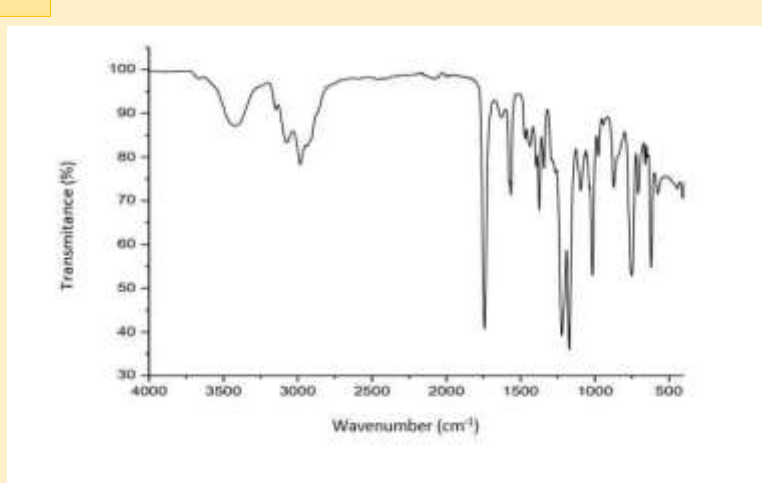

Ionic Liquid [EOMIM][Br]

The spectra on the left shows the FTIR spectra of the biopolymer mixture KCAR\_LBG for the different IL ratios. These measurements serve to confirm the characteristic bands of the KCAR\_LBG composite functionalized with the IL [EOMIM][Br]. The sample identified in the figure as KCAR\_LBG does not have the presence of IL thus allowing a comparison of band intensities to be possible. The band at 1750 cm<sup>-1</sup> corresponds to the carbonyl C=O bond which is a representative band of IL [EOMIM][Br] and it can be seen that in the 1:3 and 1:6 ratios these bands have a higher intensity compared to the KCAR\_LBG and 1:1 ratio samples. The band related to the imidazolium rings on IL can also be observed close to the wavenumber of 1600 cm<sup>-1</sup>.

## Levothyroxine loaded into aerogel

### Aerogel - Supercritical drying:

- Pressure: 140 bar
- Temperature: 40°C
- Time: 2 h

Levothyroxine loading  
using a saturated  
levothyroxine solution in  
DMSO

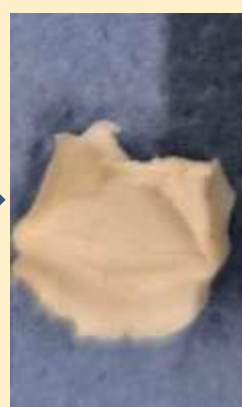

## Release assay of L-Thyroxine

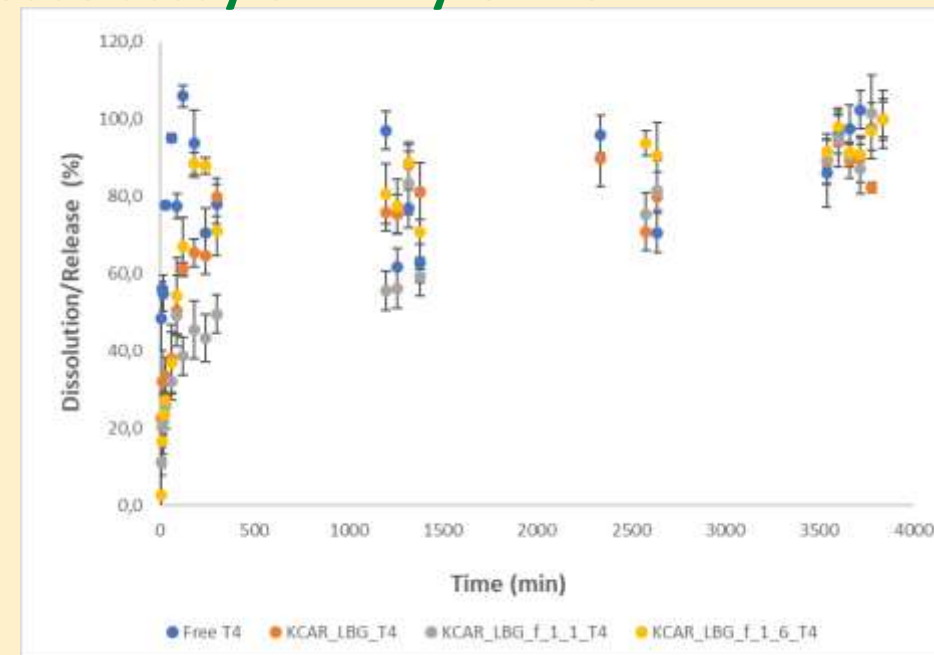

Phosphate  
Buffer pH 7.4  
T=37°C

K-Peppas and Higuchi kinetic parameters for the release of levothyroxine

| Samples      | K-Peppas       |                       |        | Higuchi        |                       |
|--------------|----------------|-----------------------|--------|----------------|-----------------------|
|              | R <sup>2</sup> | k(min <sup>-1</sup> ) | n      | R <sup>2</sup> | k(min <sup>-1</sup> ) |
| KCAR_LBG_T4  | 0,331          | 29,28195              | 0,0609 | 0,2256         | 0,1942                |
| KCAR_LBG_0_0 | 0,8933         | 17,38201              | 0,1939 | 0,7629         | 0,8129                |
| KCAR_LBG_1_1 | 0,939          | 10,86926              | 0,2668 | 0,9241         | 1,2598                |
| KCAR_LBG_1_6 | 0,7075         | 8,014935              | 0,4265 | 0,6504         | 1,2598                |

KCAR\_LBG\_T4

KCAR\_LBG 1:1

KCAR\_LBG 1:6

The matrices KCAR\_LBG, KCAR\_LBG 1:1 and KCAR\_LBG 1:6 were impregnated respectively with 79.5 % (m/m), 67.5 % (m/m) and 53.1 % (m/m) of levothyroxine. The amount of levothyroxine that could be loaded in the three different aerogel matrixes differs substantially. The presence of ionic liquid apparently does not promote the adsorption capacity of the drug and, the higher macroporosity observed on sample KCAR\_LBG 1:6 may also be interfering with the process. Apparently, this matrix is less able to retain the drug inside the porous structure.

The release profiles of levothyroxine at physiologic pH 7.4 for the composites KCAR\_LBG\_T4, KCAR\_LBG 1:1\_T4 and KCAR\_LBG 1:6\_T4 samples are shown above. The release plateau is reached in about 3500 min (2 ½ days) corresponding to around 17 %, 19 % and 35 % of the total loaded levothyroxine in each composite, respectively. Matrixes decompose in up to 5 days and consequently the total amount of drug is released.

In the table above are presented the correlation factors (R<sup>2</sup>) determined through the adjustment of the two kinetic models more adjustable to the release curves: i) log C vs log t (K. Peppas) and ii) C vs t<sup>0.5</sup> (Higuchi), where C represents the percentage of drug in solution at time t (released) and where t represents the time in minutes.

For all composites the best fitting is achieved with the Korsmeyer and Peppas model with a good correlation factor (R<sup>2</sup>). Since the matrixes present some swellable degree it was considered that the K. Peppas kinetic model would best represent the release mechanism of levothyroxine from composites. The kinetic parameters determined for drug release through K. Peppas and Higuchi models are also presented in the table. The parameter k is the Korsmeyer release constant and n is an empirical parameter that characterizes the release mechanism. The n values of Korsmeyer-Peppas are mostly less than 0.5 suggesting the release mechanism was governed by diffusion.

## API-ILs based L-Thyroxine

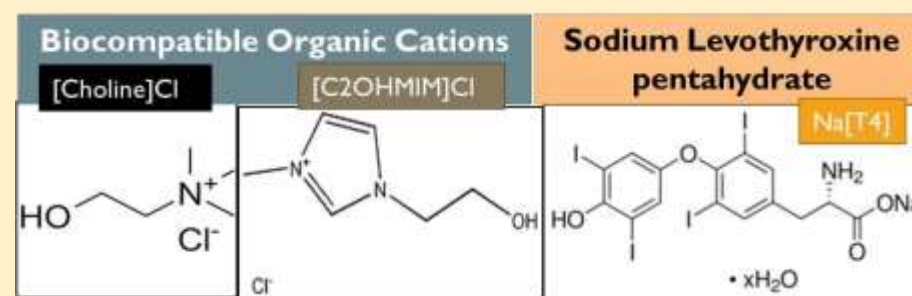

### Synthesis

ANIONIC EXCHANGE REACTION [CATION]Cl + Na[T4]

Ethanol rt, 24h

[CATION][T4] + NaCl

### Water Solubility studies

| Compounds     | Solubility (g/L) 37°C |
|---------------|-----------------------|
| Na[T4]        | 0.153                 |
| [Cholin][T4]  | ~0.476                |
| [C2OHMIM][T4] | ~0.476                |

Based on the literature it is proven that this method improves the bioavailability of drugs. In this reaction 2 biocompatible organic cations, C2OHMIM and choline chloride, were used. The reaction worked and the samples were characterized by HNMR. Positive results were obtained with this reaction, the reaction with the choline chloride cation had a yield of 65% and the reaction with C2OHMIM 68%. The solubility tests were performed in water at 37°C. It can be seen an increase up to 4-5 times compared to the starting levothyroxine.

## Highlights

- Successful preparation of levothyroxine loaded aerogel
- New API ILs based levothyroxine have been developed
- Significantly improvement of water solubility at 37°C (4 to 5 times comparing with original API)

## References

- L. Chiovato, F. Magri, A. Carlé, Adv. Therapy 2019, 36, 47.
- L. Wartofsky, Expert Opin Pharmacother. 2002, 3, 727.
- V.R. Patel, V.R., Y.K. Agrawal, J. Adv. Pharm. Technol Research, 2011, 2, 81.
- a) I.M.Marrucho, L.C.Branco, L.P.N Rebelo, Ann. Rev Chem Biomol Eng. 2014, 527.
- Ledeřt I, Romanescu M, Cîrcioabă D, Ledet A, Vlase G, Vlase T, Suciu O, Murariu M, Olariu S, Matusz P, Buda V, Piciu D. Stability and Compatibility Studies of Levothyroxine Sodium in Solid Binary Systems—Instrumental Screening. Pharmaceutics. 2020; 12(1):58.

## Acknowledgements

We thanks to financial support from the Associate Laboratory for Green Chemistry LAQV (UIDB/50006/2020). This work is also financed by FCT/MCTES in the project PTDC/QUI-QOR/32406/2017
